# Supplementary material for: A Multi-Enzyme Cascade Response for the Colorimetric Recognition of Organophosphorus Pesticides Utilizing Core-Shell Pd@Pt Nanoparticles with High Peroxidase-like Activity
Source: Foods. 2023 Sep 4;12(17):3319. doi: 10.3390/foods12173319 (PMC10486685; doi:10.3390/foods12173319)
Supplement: Supplementary file 1 [file foods-12-03319-s001.zip › foods-2522529-supplementary.pdf]

---

## SUPPLEMENTARY FILE

### **A multi-enzyme cascade response for the colorimetric recognition of organophosphorus pesticides utilizing core-shell Pd@Pt nanoparticles with high peroxidase-like activity**

**Majid Zainabu <sup>1</sup>, Qi Zhang <sup>1</sup>, Zhansen Yang <sup>1</sup>, Huilian Che <sup>1,2,\*</sup> and Nan Cheng <sup>1,\*</sup>**

<sup>1</sup> Beijing Laboratory for Food Quality and Safety, College of Food Science and Nutritional Engineering, China Agricultural University, Beijing 100083, China;

<sup>2</sup> Key Laboratory of Precision Nutrition and Food Quality, Key Laboratory of Functional Dairy, Ministry of Education, College of Food Science and Nutritional Engineering, China Agricultural University, Beijing 100083, China

\* Correspondence: chengnanfsne@cau.edu.cn

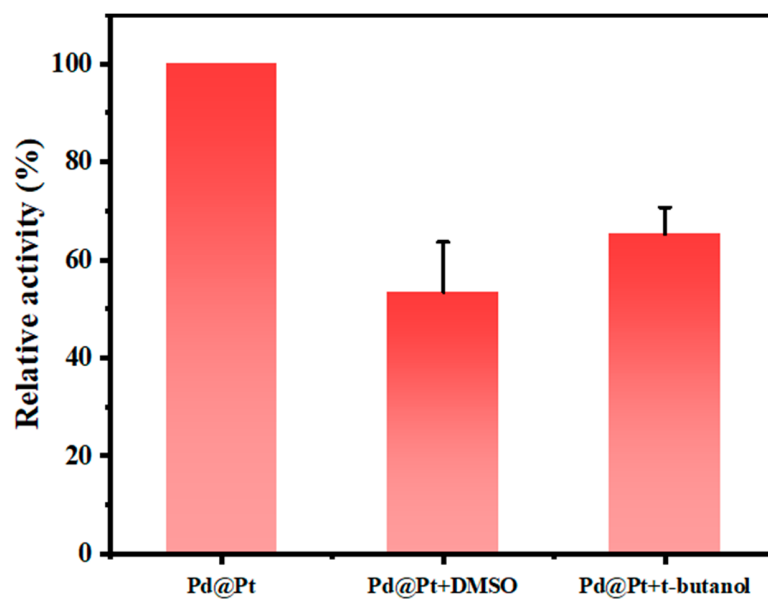

**Figure S1.** Effect of ·OH scavengers on the peroxidase activity of Pd@Pt. Effect of dimethyl sulfoxide (DMSO) and t-butynol on POD-like activity of Pd@Pt nanoparticles. The standard error (s.e.) was revealed as error bars after three independent experiments.

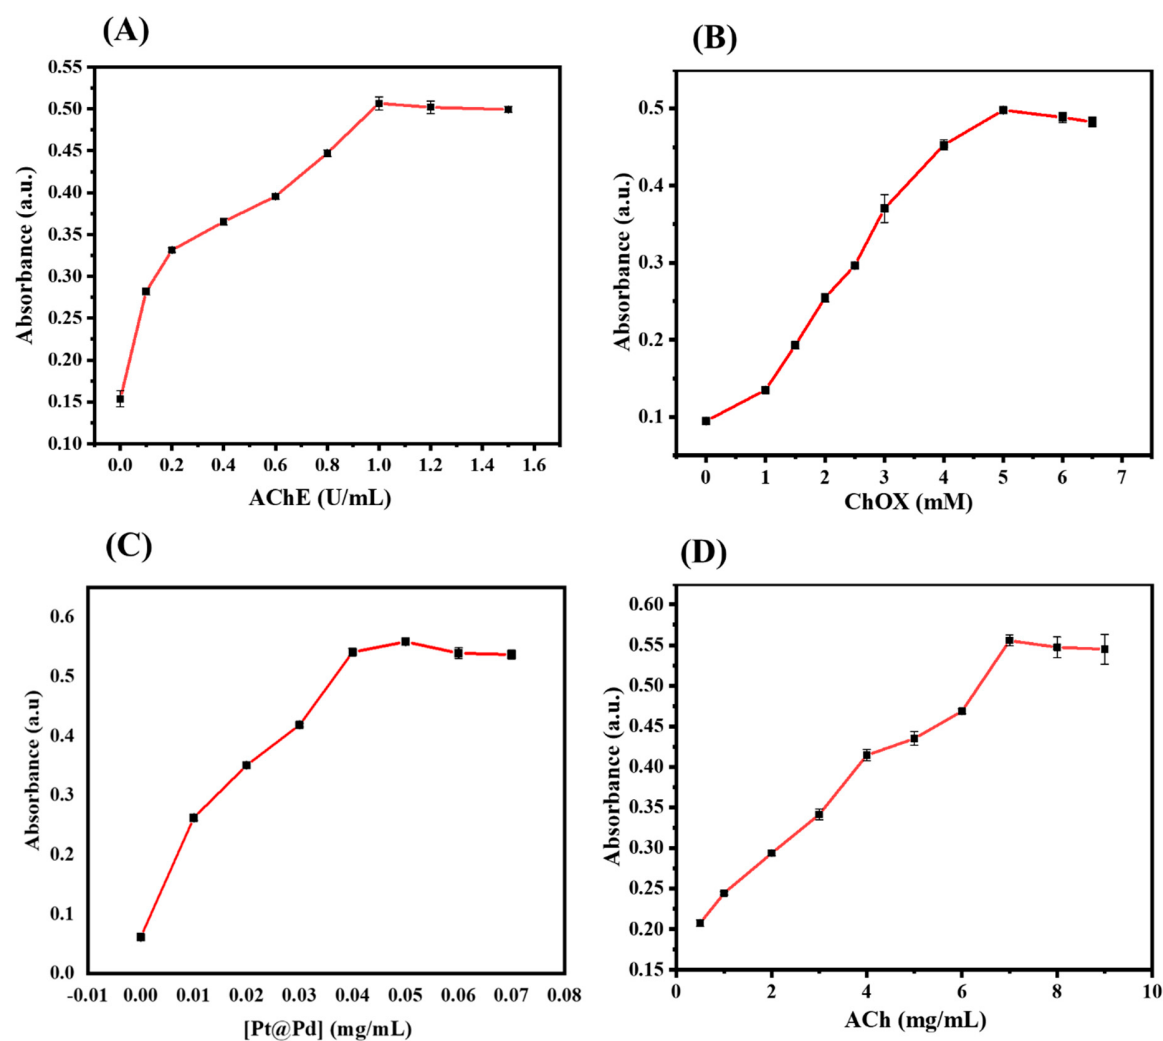

**Figure S2.** The condition optimization of a multi-enzyme cascade reaction. The effect of (A) AChE; (B) ChOX; (C) Pd@Pt nanozyme; and (D) ACh concentrations on different reaction system, respectively. Error bars indicate the standard error (s.e) of three independent experiments.

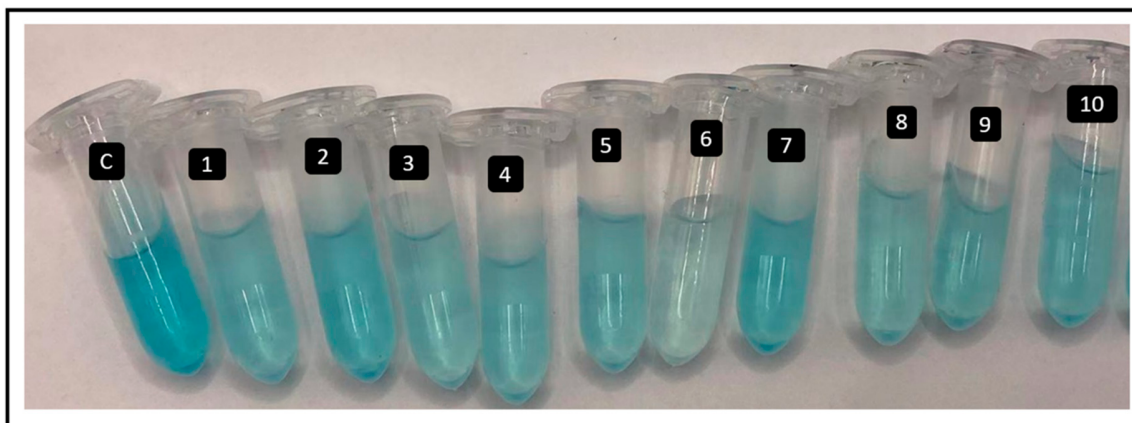

**Figure S3.** The representative images of real samples sprayed with Parathion. Inside are different tested samples of C-Control sample (no OP); 1-spinach; 2-apple; 3-banana; 4-cabbage; 5-broccoli; 6-tomato; 7-eggplant; 8-ginger; 9-Potatoes and 10-Mango samples. This section may be divided by subheadings. It should provide a concise and precise description of the experimental results, their interpretation, as well as the experimental conclusions that can be drawn.

#### *POD-like activity parameters and comparison of noble metal-based nanoparticles*

**Table S1** POD-like activity parameters and comparison of noble metal-based nanoparticles

| Category                        | Catalysts                   | $K_m$ (mM) | $V_{max}$ (M s <sup>-1</sup> ) | References |
|---------------------------------|-----------------------------|------------|--------------------------------|------------|
| Noble metal-based nanoparticles | Tyrosine-capped Ag-NPs      | 0.053      | $3.7 \times 10^{-8}$           | [1]        |
|                                 | PtNP@UiO-66-NH <sub>2</sub> | 0.127      | $1.36 \times 10^{-8}$          | [2]        |
|                                 | BSA-stabilized Pt NPs       | 0.119      | $29 \times 10^{-8}$            | [2]        |
|                                 | citrate-capped Pt NPs       | 0.121      | $6.51 \times 10^{-8}$          | [2]        |
|                                 | Pt/cube-CeO <sub>2</sub>    | 0.26       | $1.47 \times 10^{-7}$          | [3]        |
|                                 | Pd NCs                      | 0.063      | $7.64 \times 10^{-8}$          | [4]        |
|                                 | Au-Pt NCs                   | 0.362      | 11.366                         | [5]        |
|                                 | HRP                         | 0.4376     | $1.38 \times 10^{-6}$          | [50]       |
|                                 | Pd@Pt                       | 0.26417    | 0.36002                        | This work  |

$K_m$  is the Michaelis-Menten constant,  $v_{max}$  is the maximal reaction rate

#### References

1. Weerathunge, P., Behera, B. K., Zihara, S., Singh, M., Prasad, S. N., Hashmi, S., ... Ramanathan, R. Dynamic interactions between peroxidase-mimic silver NanoZymes and chlorpyrifos-specific

aptamers enable highly-specific pesticide sensing in river water. *Analytica Chimica Acta*, **2019**, 1083, 157-165

2. Li, H., Liu, H., Zhang, J., Cheng, Y., Zhang, C., Fei, X., & Xian, Y. Platinum Nanoparticle Encapsulated Metal–Organic Frameworks for Colorimetric Measurement and Facile Removal of Mercury(II). *ACS Applied Materials & Interfaces*, **2017**, 9(46), 40716–40725.
3. Li, Z., Yang, X., Yang, Y., Tan, Y., He, Y., Liu, M., ... Yuan, Q. (2017). Peroxidase-Mimicking Nanozyme with Enhanced Activity and High Stability Based on Metal-Support Interactions. *Chemistry - A European*, **2017**, 24(2), 409–415.
4. Zhang, Q., Zheng, S., Zhang, J. et al. Peroxidase Mimicking Activity of Palladium Nanocluster Altered by Heparin. *Catal Lett*, **2021**, 151, 2537–2546.
5. Feng, J., Huang, P., & Wu, F.-Y. Gold–platinum bimetallic nanoclusters with enhanced peroxidase-like activity and their integrated agarose hydrogel-based sensing platform for the colorimetric analysis of glucose levels in serum. *The Analyst*, **2017**, 142(21), 4106–4115.
